# Supplementary material for: An α1-adrenergic receptor ligand repurposed as a potent antiproliferative agent for head and neck squamous cell carcinoma
Source: Royal Society of Chemistry journal article supplement (doi:10.1039/c4ra11856a), 2014-12-17
Supplement: c4ra11856a1.pdf [file c4ra11856a1.pdf]

Electronic Supplementary Material (ESI) for RSC Advances.  
This journal is © The Royal Society of Chemistry 2014

## An $\alpha_1$ -adrenergic receptor ligand repurposed as potent antiproliferative agent on head and neck squamous cell carcinoma

Chiara Zagni,<sup>ab</sup> Douglas Magno Guimarães,<sup>b</sup> Loredana Salerno,<sup>a</sup> Francesco Punzo,<sup>a</sup> Cristiane H. Squarize,<sup>b</sup> Placido G. Mineo,<sup>cd</sup> Giuseppe Romeo\*<sup>a</sup> and Antonio Rescifina\*<sup>a</sup>

<sup>a</sup> Dipartimento di Scienze del Farmaco, Università di Catania, V.le A. Doria 6, I-95126 Catania, Italy. E-mail: [arescifina@unict.it](mailto:arescifina@unict.it); [gromeo@unict.it](mailto:gromeo@unict.it); Fax: +3906233208980; Tel: +39390957385017

<sup>b</sup> Laboratory of Epithelial Biology, Department of Periodontics and Oral Medicine, University of Michigan, Ann Arbor, MI 48109-1078, USA

<sup>c</sup> CNR-IPCF Istituto per i Processi Chimico Fisici, Viale Ferdinando Stagno D'Alcontres, 37, 98158 Messina, Italy

<sup>d</sup> Dipartimento di Scienze Chimiche and I.N.S.T.M. UdR of Catania, Università di Catania, Viale A. Doria, 6, 95125 Catania, Italy

### *Spectroscopic and analytical data for RN5-Me*

#### **General methods and instrumentation**

Melting point was determined in open capillary on a Büchi 530 apparatus and is uncorrected. Elemental analyses (C, H, N) was performed on a Carlo Erba CHNS-0 EA1106 analyser; the analytical results were within  $\pm 0.4\%$  of the theoretical value assuring a purity  $\geq 95\%$ .

NMR spectra were measured with a Varian VNMR-S 500 MHz spectrometer (Varian, Palo Alto CA, USA) at 300 K using a 5 mm inverse detection broadband probe. A total of 10 mg of compound was dissolved in 0.7 mL of DMSO- $d_6$ . Chemical shifts were given in ppm relative to the remaining signals of DMSO as an internal reference ( $^1\text{H}$  NMR: 2.50 ppm;  $^{13}\text{C}$  NMR: 39.5 ppm).  $^1\text{H}$  NMR spectrum was recorded at 499.883 MHz with the following parameters: 6.7  $\mu\text{s}$  90° pulse length, 4500 Hz spectral width, 64k data points, 24 scans, and relaxation delay 1 s.  $^{13}\text{C}$  NMR spectrum was recorded at 125.709 MHz with 1H WALTZ decoupling and APT macro; other parameters were chosen as follows: 26400 Hz spectral width, 64k data points, 4000 scans, relaxation delay 10 s, and decoupling field 2.5 kHz. 2D gradient enhanced  $^1\text{H}$ - $^1\text{H}$  correlated (gCOSY) spectrum was acquired with 16 scans per t1 value for 512 experiments of 2048 data points and processed with linear prediction.

The MALDI-TOF mass spectrum was acquired by a Voyager DE (PerSeptive Biosystem) using a delay extraction procedure (25 kV applied after 1000 ns with a potential gradient of 454 V/mm and a wire voltage of 25 V) with ion detection in linear mode. The instrument was equipped with a nitrogen laser (emission at 337 nm for 3 ns) and a flash AD converter (time base 2). To prevent fragmentation of the polymers, the laser irradiance was slightly above the threshold (ca. 106 W/cm<sup>2</sup>). Each spectrum was an average of 32 laser shots. The MALDI experiments were performed by loading a 0.1 mmol sample and 40 mmol matrix *trans*-3-indoleacrylic acid (IAA) onto the sample plate with DMF as the solvent. Both 5,10-di(*p*-dodecanoxyphenyl)-15,20-di(*p*-hydroxyphenyl) porphyrin (C<sub>68</sub>H<sub>78</sub>N<sub>4</sub>O<sub>4</sub>, 1014 Da), tetrakis(*p*-dodecanoxyphenyl)porphyrin

(C<sub>92</sub>H<sub>126</sub>N<sub>4</sub>O<sub>4</sub>, 1350 Da) and a PEG sample of a known structure were used as external standards for *m/z* calibration.

### RN5-Me data

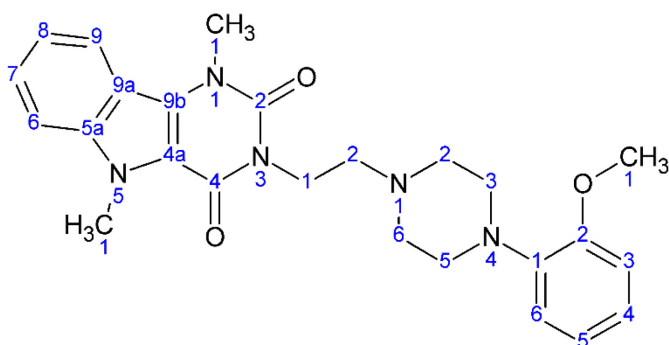

3-{2-[4-(2-methoxyphenyl)piperazin-1-yl]ethyl}-1,5-dimethyl-1*H*-pyrimido[5,4-*b*]indole-2,4(3*H*,5*H*)-dione.

White powder, mp 175 °C (from EtOH/H<sub>2</sub>O).

$\delta_{\text{H}}$ (500 MHz, DMSO-*d*<sub>6</sub>, DMSO-*d*<sub>6</sub>) 2.61–2.66 (6H, m), 2.97–2.99 (6H, m), 3.78 (3H, s, OMe), 3.84 (3H, s, NMe), 4.08 (3H, s, NMe), 4.14 (2H, dd, *J* = 6.8, 8.2 Hz, N(3)CH<sub>2</sub>), 6.85–6.93 (4H, m, H(3–6) aromatics), 7.19 (1H, ddd, *J* = 1.1, 8.2, 8.4 Hz, H(8) aromatic), 7.49 (1H, ddd, *J* = 1.1, 8.2, 8.6 Hz, H(7) aromatic), 7.60 (1H, dt, *J* = 1.1, 8.6 Hz, H(6) aromatic), 8.10 (1H, dt, *J* = 1.1, 8.4 Hz, H(9) aromatic).

$\delta_{\text{C}}$ (125 MHz, DMSO-*d*<sub>6</sub>, DMSO-*d*<sub>6</sub>) 30.77, 32.43, 38.19, 50.01, 53.13, 55.15, 55.25, 110.90, 111.87, 113.26, 114.46, 117.82, 120.03, 120.78, 121.97, 122.24, 126.90, 127.21, 139.20, 141.19, 150.43, 151.90, 155.97.

Found: C, 67.3; H, 6.4; N, 15.9. C<sub>25</sub>H<sub>29</sub>N<sub>5</sub>O<sub>3</sub> requires C, 67.1; H, 6.5; N, 15.65%.

MALDI-TOF MS: *m/z* 448.83 MH<sup>+</sup>; 470.70 MNa<sup>+</sup>; 486.74 MK<sup>+</sup>.

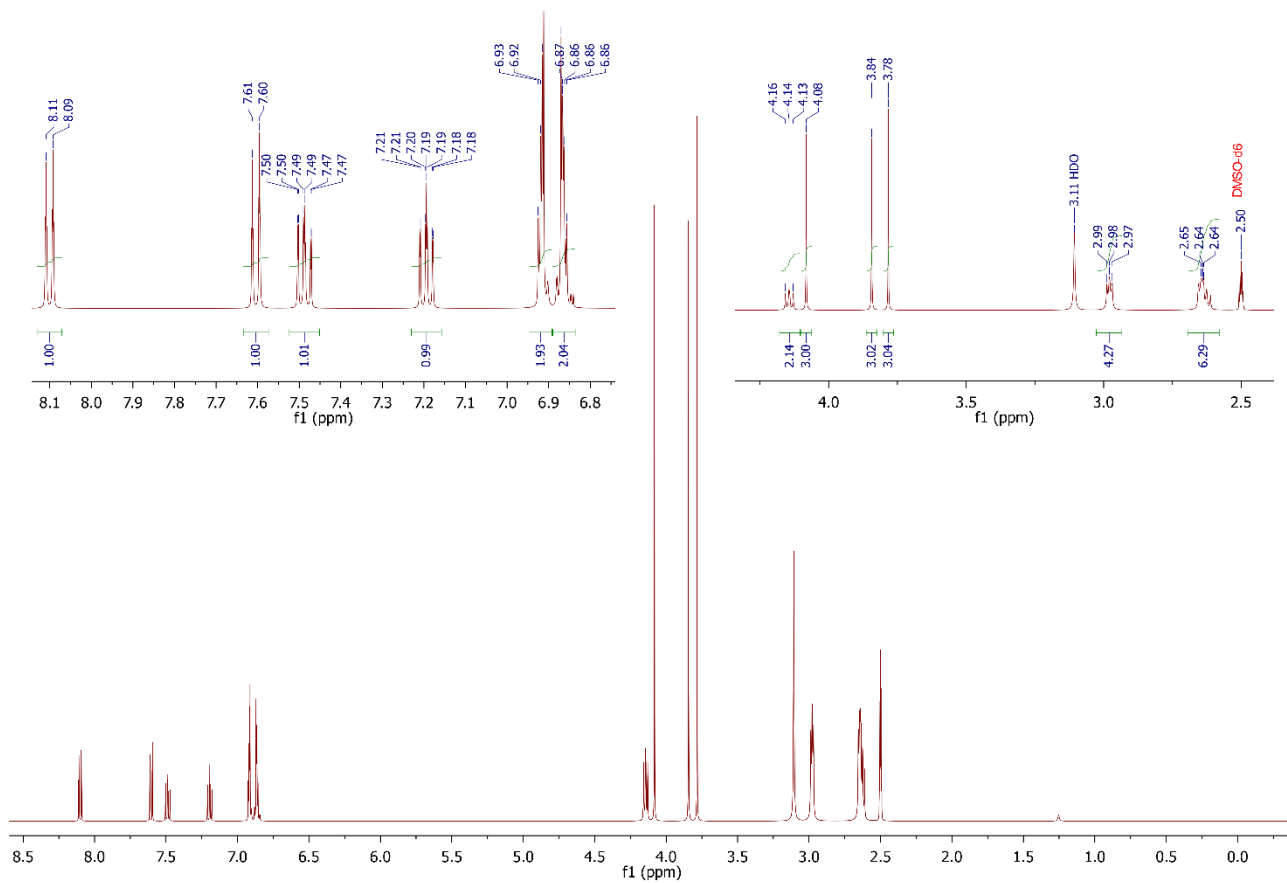

Fig. S1  $^1\text{H}$  NMR spectrum of RN5-Me.

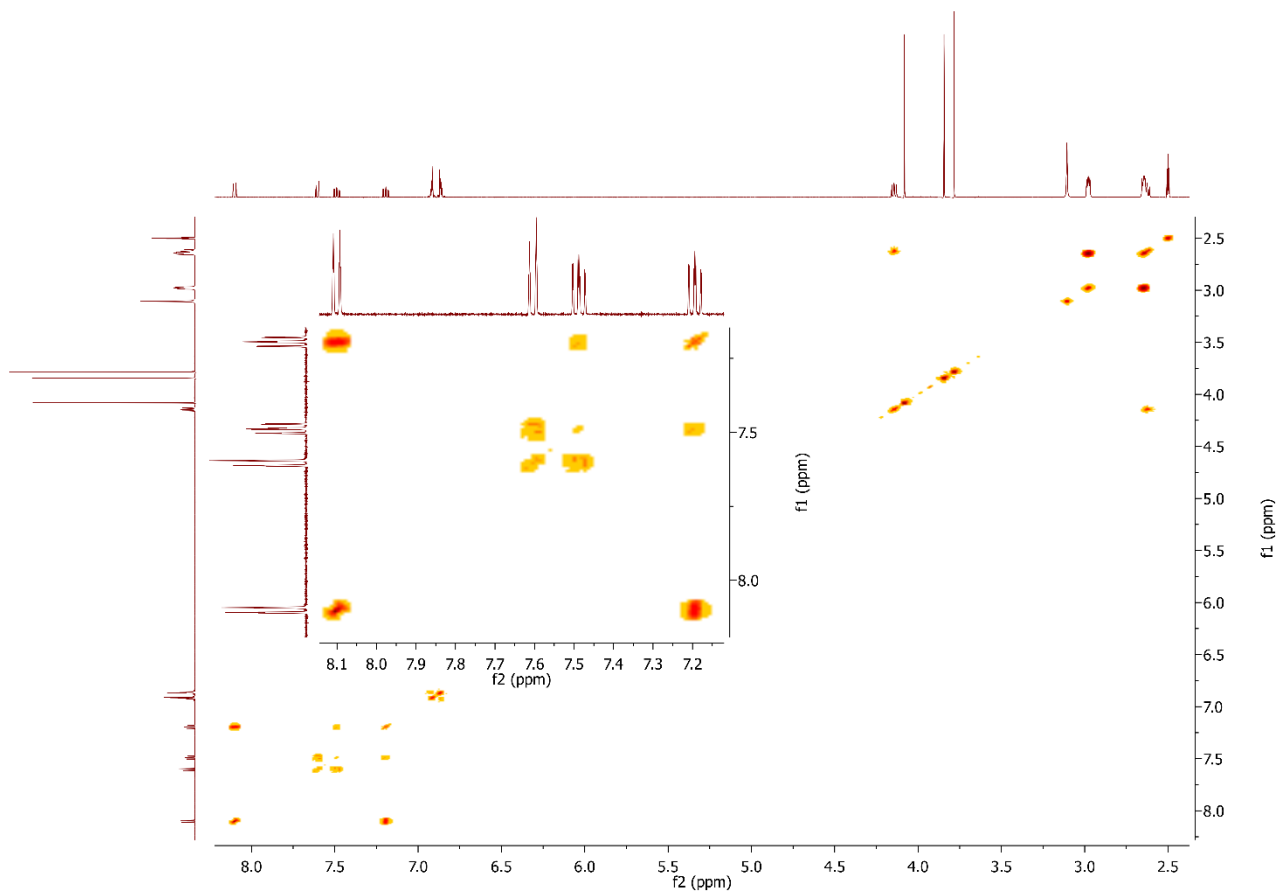

Fig. S2 gCOSY spectrum of RN5-Me.

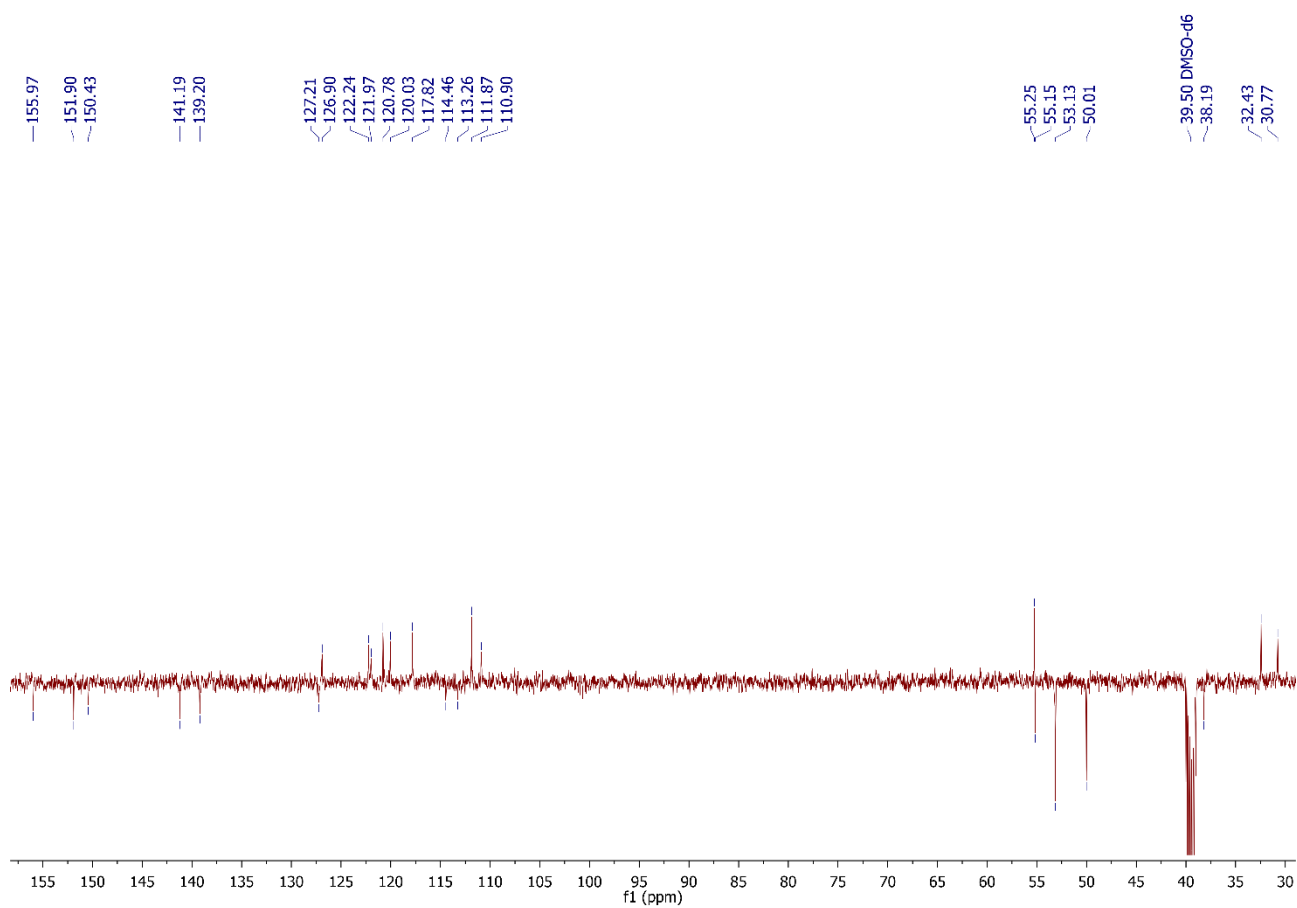

Fig. S3 APT spectrum of RN5-Me.

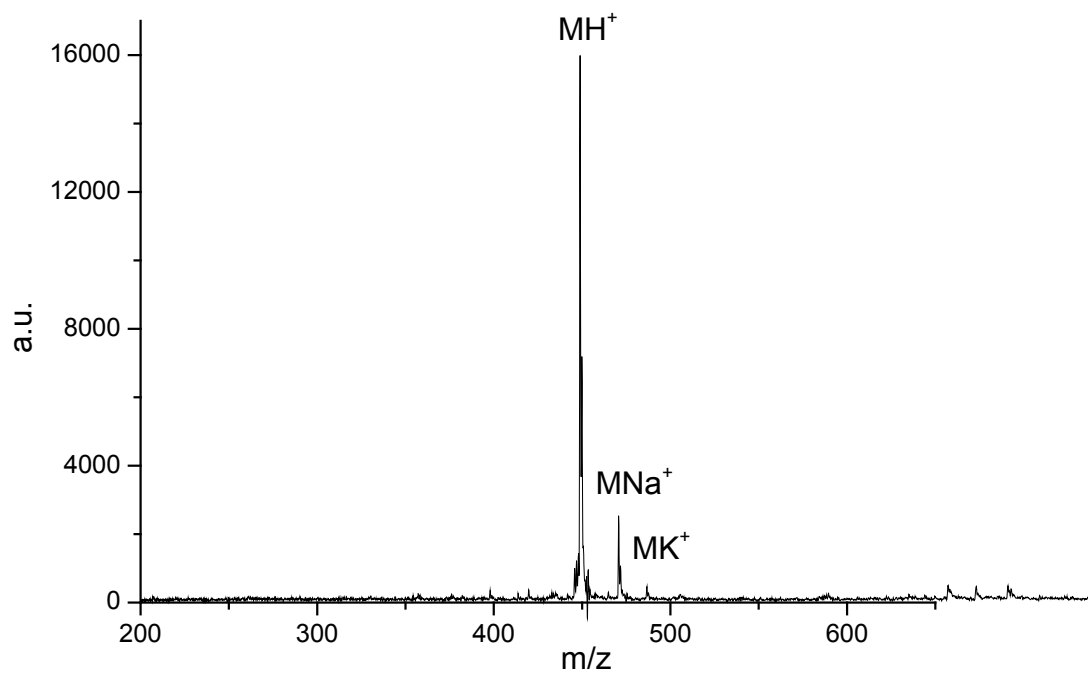

Fig. S4 MALDI-TOF mass spectrum of RN5-Me.
